# Supplementary material for: The Association of Different Types of Leisure Time Physical Activities with Cardiometabolic Outcomes in Singapore—Findings from the Multi-Ethnic Cohort Study
Source: PubMed Central journal article supplement (PMC7731378; doi:10.3390/ijerph17239030), 2020-12-03
Supplement: ijerph-17-09030-s001.pdf [file ijerph-17-09030-s001.pdf]

**Supplemental table 1:** Association between cardiometabolic measures and total leisure time physical activity (LTPA), stratified by ethnicity.

| Ethnicity      | Total LTPA    | Outcomes                                                |                                                         |                                                      |                                   |                                                           |                                                          |                                   |
|----------------|---------------|---------------------------------------------------------|---------------------------------------------------------|------------------------------------------------------|-----------------------------------|-----------------------------------------------------------|----------------------------------------------------------|-----------------------------------|
|                |               | BMI (kg/m <sup>2</sup> )                                | Waist Circumference (cm)                                | Systolic Blood Pressure (mmHg)                       | Diastolic Blood Pressure (mmHg)   | Triglycerides (mg/dL)                                     | HDL (mg/dL)                                              | LDL (mg/dL)                       |
|                |               | Effect size (95%CI)                                     | Effect size (95%CI)                                     | Effect size (95%CI)                                  | Effect size (95%CI)               | Effect size (95%CI)                                       | Effect size (95%CI)                                      | Effect size (95%CI)               |
| Chinese        | 0 MET-h/wk    | reference                                               | reference                                               | reference                                            | reference                         | reference                                                 | reference                                                | reference                         |
|                | 0-15 MET-h/wk | -0.24<br>(-0.50, 0.02)<br>P=0.065                       | -0.48<br>(-1.58, 0.62)<br>P=0.395                       | 0.75<br>(-0.46, 1.95)<br>P=0.224                     | -0.04<br>(-0.68, 0.77)<br>P=0.904 | 1.51<br>(-3.24, 6.25)<br>P=0.534                          | 0.30<br>(-0.64, 1.23)<br>P=0.536                         | 0.30<br>(-1.92, 2.52)<br>P=0.790  |
|                | > 15 MET-h/wk | -0.04<br>(-0.34, 0.25)<br>P=0.769                       | -0.03<br>(-1.3, 1.23)<br>P=0.962                        | 0.92<br>(-0.46, 2.31)<br>P=0.192                     | -0.65<br>(-1.49, 0.19)<br>P=0.130 | -1.75<br>(-7.24, 3.74)<br>P=0.531                         | <b>1.77</b><br><b>(0.69, 2.86)</b><br><b>P=0.001</b>     | 1.67<br>(-0.90, 4.24)<br>P=0.202  |
| Model 1* Malay | 0 MET-h/wk    | reference                                               | reference                                               | reference                                            | reference                         | reference                                                 | reference                                                | reference                         |
|                | 0-15 MET-h/wk | -0.10<br>(-0.57, 0.38)<br>P=0.687                       | -1.29<br>(-4.27, 1.7)<br>P=0.398                        | 0.38<br>(-1.22, 1.98)<br>P=0.644                     | -0.08<br>(-1.03, 0.87)<br>P=0.866 | -1.34<br>(-8.81, 6.13)<br>P=0.726                         | 0.97<br>(-0.13, 2.07)<br>P=0.084                         | 0.85<br>(-2.36, 4.06)<br>P=0.602  |
|                | > 15 MET-h/wk | -0.08<br>(-0.62, 0.46)<br>P=0.774                       | -0.90<br>(-4.27, 2.48)<br>P=0.603                       | 1.74<br>(-0.07, 3.55)<br>P=0.060                     | -0.36<br>(-1.43, 0.71)<br>P=0.511 | -5.13<br>(-13.58, 3.33)<br>P=0.235                        | 1.03<br>(-0.21, 2.27)<br>P=0.103                         | -0.79<br>(-4.42, 2.84)<br>P=0.669 |
| Indian         | 0 MET-h/wk    | reference                                               | reference                                               | reference                                            | reference                         | reference                                                 | reference                                                | reference                         |
|                | 0-15 MET-h/wk | <b>-0.53</b><br><b>(-0.99, -0.06)</b><br><b>P=0.026</b> | <b>-3.18</b><br><b>(-5.81, -0.55)</b><br><b>P=0.018</b> | 0.33<br>(-1.27, 1.93)<br>P=0.683                     | 0.11<br>(-0.8, 1.02)<br>P=0.811   | <b>-13.2</b><br><b>(-21.05, -5.34)</b><br><b>P=0.001</b>  | <b>1.48</b><br><b>(0.41, 2.55)</b><br><b>P=0.007</b>     | 0.65<br>(-2.35, 3.65)<br>P=0.669  |
|                | > 15 MET-h/wk | <b>-0.56</b><br><b>(-1.08, -0.03)</b><br><b>P=0.038</b> | <b>-3.71</b><br><b>(-6.68, -0.74)</b><br><b>P=0.014</b> | <b>2.06</b><br><b>(0.25, 3.87)</b><br><b>P=0.026</b> | -0.13<br>(-1.16, 0.90)<br>P=0.807 | <b>-12.63</b><br><b>(-21.52, -3.73)</b><br><b>P=0.005</b> | <b>2.46</b><br><b>(1.25, 3.67)</b><br><b>P=&lt;0.001</b> | -1.56<br>(-4.96, 1.84)<br>P=0.369 |
| Model          | Chinese       | 0 MET-h/wk                                              |                                                         | reference                                            | reference                         | reference                                                 | reference                                                | reference                         |

|        |               |  |                                                      |                                   |                                                           |                                                          |                                   |
|--------|---------------|--|------------------------------------------------------|-----------------------------------|-----------------------------------------------------------|----------------------------------------------------------|-----------------------------------|
| 2^     | 0-15 MET-h/wk |  | 1.04<br>(-0.12, 2.2)<br>P=0.078                      | 0.18<br>(-0.53, 0.90)<br>P=0.611  | 2.93<br>(-1.60, 7.46)<br>P=0.206                          | -0.05<br>(-0.92, 0.83)<br>P=0.916                        | 0.69<br>(-1.50, 2.88)<br>P=0.536  |
|        | > 15 MET-h/wk |  | 0.92<br>(-0.41, 2.26)<br>P=0.176                     | -0.66<br>(-1.48, 0.16)<br>P=0.117 | -1.40<br>(-6.64, 3.84)<br>P=0.600                         | 1.70<br>(0.68, 2.71)<br>P=0.001                          | 1.74<br>(-0.79, 4.27)<br>P=0.178  |
| Malay  | 0 MET-h/wk    |  | reference                                            | reference                         | reference                                                 | reference                                                | reference                         |
|        | 0-15 MET-h/wk |  | 0.48<br>(-1.07, 2.02)<br>P=0.544                     | -0.03<br>(-0.95, 0.89)<br>P=0.948 | -0.43<br>(-7.60, 6.74)<br>P=0.907                         | 0.84<br>(-0.19, 1.87)<br>P=0.111                         | 1.12<br>(-2.06, 4.29)<br>P=0.490  |
|        | > 15 MET-h/wk |  | <b>1.80</b><br><b>(0.05, 3.55)</b><br><b>P=0.044</b> | -0.33<br>(-1.38, 0.72)<br>P=0.538 | -4.65<br>(-12.77, 3.46)<br>P=0.261                        | 0.98<br>(-0.18, 2.15)<br>P=0.099                         | -0.63<br>(-4.22, 2.96)<br>P=0.732 |
| Indian | 0 MET-h/wk    |  | reference                                            | reference                         | reference                                                 | reference                                                | reference                         |
|        | 0-15 MET-h/wk |  | 0.75<br>(-0.81, 2.31)<br>P=0.343                     | 0.31<br>(-0.59, 1.20)<br>P=0.505  | <b>-11.81</b><br><b>(-19.57, -4.06)</b><br><b>P=0.003</b> | <b>1.19</b><br><b>(0.16, 2.22)</b><br><b>P=0.023</b>     | 1.07<br>(-1.91, 4.06)<br>P=0.481  |
|        | > 15 MET-h/wk |  | <b>2.48</b><br><b>(0.72, 4.24)</b><br><b>P=0.006</b> | 0.07<br>(-0.94, 1.09)<br>P=0.889  | <b>-11.15</b><br><b>(-19.93, -2.37)</b><br><b>P=0.013</b> | <b>2.08</b><br><b>(0.92, 3.25)</b><br><b>P=&lt;0.001</b> | -1.07<br>(-4.45, 2.31)<br>P=0.537 |

\*: Model adjusted for age, gender, ethnicity, educational status, smoking status, alcohol consumption and total LTPA. ^: Additional BMI adjustment for systolic and diastolic blood pressure, triglycerides, HDL and LDL. CI, confidence interval; cm, centimeters; BMI, body mass index; HDL, high-density lipoprotein; kg/m<sup>2</sup>, kilogram-meter square; LDL, low-density lipoprotein; LTPA, leisure time physical activity; MET, metabolic equivalent of task; mg/dL, milligrams per deciliter; mmHG, millimeters of mercury; h/wk, hours per week. Bold values indicate statistical significance.

**Supplemental table 2:** Association\* between cardiometabolic measures and leisure time physical activity (LTPA) subtypes, stratified by ethnicity.

| Categorized as participated yes/no with no being the reference category |         | Effect size (95%CI)                                        | Effect size (95%CI)                | Effect size (95%CI)               | Effect size (95%CI)                                     | Effect size (95%CI)                                      | Effect size (95%CI)                                     | Effect size (95%CI)                |
|-------------------------------------------------------------------------|---------|------------------------------------------------------------|------------------------------------|-----------------------------------|---------------------------------------------------------|----------------------------------------------------------|---------------------------------------------------------|------------------------------------|
| Balance exercises                                                       | Chinese | <b>-0.60</b><br><b>(-1.02, -0.17)</b><br><b>P=0.006</b>    | 0.02<br>(-1.78, 1.83)<br>P=0.978   | -1.64<br>(-3.66, 0.38)<br>P=0.111 | <b>-1.36</b><br><b>(-2.58, -0.14)</b><br><b>P=0.029</b> | -4.01<br>(-11.94, 3.93)<br>P=0.323                       | -0.34<br>(-1.91, 1.23)<br>P=0.673                       | -0.37<br>(-4.10, 3.36)<br>P=0.847  |
|                                                                         | Malay   | -0.63<br>(-1.94, 0.67)<br>P=0.343                          | -3.87<br>(-12.05, 4.32)<br>P=0.355 | -3.47<br>(-8.07, 1.13)<br>P=0.139 | <b>-3.42</b><br><b>(-6.13, -0.71)</b><br><b>P=0.014</b> | -0.30<br>(-21.19, 20.59)<br>P=0.978                      | 0.25<br>(-2.82, 3.32)<br>P=0.874                        | -7.75<br>(-16.73, 1.22)<br>P=0.090 |
|                                                                         | Indian  | -0.84<br>(-1.69, 0)<br>P=0.051                             | -2.25<br>(-7.07, 2.56)<br>P=0.359  | -1.60<br>(-4.54, 1.33)<br>P=0.284 | -0.93<br>(-2.60, 0.74)<br>P=0.276                       | 3.79<br>(-10.63, 18.21)<br>P=0.607                       | <b>-2.03</b><br><b>(-3.99, -0.07)</b><br><b>P=0.042</b> | -2.49<br>(-7.99, 3.01)<br>P=0.375  |
| Ball games                                                              | Chinese | 0.09<br>(-0.28, 0.46)<br>P=0.638                           | -0.55<br>(-2.14, 1.04)<br>P=0.497  | -0.09<br>(-1.78, 1.59)<br>P=0.913 | -0.78<br>(-1.80, 0.23)<br>P=0.131                       | <b>-8.87</b><br><b>(-15.62, -2.11)</b><br><b>P=0.010</b> | -0.16<br>(-1.49, 1.18)<br>P=0.818                       | 1.27<br>(-1.89, 4.43)<br>P=0.430   |
|                                                                         | Malay   | 0.27<br>(-0.43, 0.97)<br>P=0.451                           | -3.61<br>(-8.01, 0.79)<br>P=0.108  | 0.49<br>(-1.83, 2.81)<br>P=0.679  | <b>-1.50</b><br><b>(-2.87, -0.13)</b><br><b>P=0.032</b> | 2.39<br>(-8.46, 13.24)<br>P=0.667                        | 0.64<br>(-0.95, 2.23)<br>P=0.430                        | -1.45<br>(-6.12, 3.23)<br>P=0.544  |
|                                                                         | Indian  | 0.46<br>(-0.23, 1.14)<br>P=0.192                           | -0.28<br>(-4.17, 3.61)<br>P=0.889  | 0.67<br>(-1.67, 3.01)<br>P=0.574  | -0.35<br>(-1.68, 0.98)<br>P=0.610                       | -4.62<br>(-16.17, 6.93)<br>P=0.433                       | -0.36<br>(-1.93, 1.21)<br>P=0.653                       | 3.89<br>(-0.52, 8.31)<br>P=0.084   |
| Cycling                                                                 | Chinese | <b>-0.80</b><br><b>(-1.23, -0.36)</b><br><b>P&lt;0.001</b> | -1.71<br>(-3.55, 0.13)<br>P=0.068  | -1.84<br>(-3.81, 0.12)<br>P=0.066 | -0.89<br>(-2.08, 0.29)<br>P=0.140                       | <b>-9.40</b><br><b>(-17.22, -1.59)</b><br><b>P=0.018</b> | <b>1.76</b><br><b>(0.22, 3.31)</b><br><b>P=0.026</b>    | -1.56<br>(-5.21, 2.10)<br>P=0.404  |
|                                                                         | Malay   | -0.70<br>(-1.44, 0.03)<br>P=0.060                          | -4.02<br>(-8.61, 0.58)<br>P=0.087  | -0.23<br>(-2.65, 2.19)<br>P=0.851 | 0.94<br>(-0.49, 2.37)<br>P=0.197                        | -0.67<br>(-12.03, 10.69)<br>P=0.908                      | 1.06<br>(-0.60, 2.73)<br>P=0.211                        | -0.99<br>(-5.87, 3.90)<br>P=0.693  |
|                                                                         | Indian  | 0.37<br>(-0.61, 1.35)                                      | 0.72<br>(-4.86, 6.30)              | 0.38<br>(-2.96, 3.73)             | -0.46<br>(-2.36, 1.45)                                  | 7.13<br>(-9.38, 23.64)                                   | -0.31<br>(-2.55, 1.93)                                  | 1.73<br>(-4.56, 8.03)              |

|                      |         |                                                         |                                     |                                                      |                                                            |                                                              |                                                         |                                                         |
|----------------------|---------|---------------------------------------------------------|-------------------------------------|------------------------------------------------------|------------------------------------------------------------|--------------------------------------------------------------|---------------------------------------------------------|---------------------------------------------------------|
|                      |         | P=0.458                                                 | P=0.800                             | P=0.822                                              | P=0.637                                                    | P=0.397                                                      | P=0.787                                                 | P=0.589                                                 |
| Dancing              | Chinese | 0.05<br>(-0.53, 0.64)<br>P=0.857                        | -0.23<br>(-2.73, 2.27)<br>P=0.855   | 0.79<br>(-2.01, 3.58)<br>P=0.581                     | 0.25<br>(-1.44, 1.94)<br>P=0.769                           | -0.74<br>(-11.61, 10.13)<br>P=0.894                          | <b>2.49</b><br><b>(0.34, 4.64)</b><br><b>P=0.023</b>    | 0.43<br>(-4.68, 5.53)<br>P=0.870                        |
|                      | Malay   | 1.11<br>(-0.43, 2.64)<br>P=0.158                        | 1.87<br>(-7.74, 11.49)<br>P=0.703   | 0.42<br>(-4.65, 5.49)<br>P=0.871                     | 0.73<br>(-2.26, 3.72)<br>P=0.631                           | 9.35<br>(-14.77, 33.47)<br>P=0.447                           | -1.31<br>(-4.85, 2.23)<br>P=0.470                       | -5.65<br>(-16.01, 4.71)<br>P=0.285                      |
|                      | Indian  | -0.43<br>(-1.62, 0.75)<br>P=0.475                       | -2.34<br>(-9.10, 4.43)<br>P=0.499   | -2.14<br>(-6.19, 1.91)<br>P=0.301                    | -2.05<br>(-4.35, 0.25)<br>P=0.081                          | -1.03<br>(-21.00, 18.95)<br>P=0.920                          | 1.90<br>(-0.81, 4.61)<br>P=0.170                        | 0.39<br>(-7.23, 8.01)<br>P=0.920                        |
| Golf                 | Chinese | 0.26<br>(-0.37, 0.90)<br>P=0.414                        | 2.01<br>(-0.69, 4.72)<br>P=0.144    | -1.34<br>(-4.26, 1.58)<br>P=0.369                    | 1.43<br>(-0.34, 3.19)<br>P=0.114                           | 5.25<br>(-6.77, 17.27)<br>P=0.392                            | 0.80<br>(-1.58, 3.18)<br>P=0.511                        | 2.29<br>(-3.36, 7.94)<br>P=0.428                        |
|                      | Malay   | -0.20<br>(-2.96, 2.55)<br>P=0.885                       | -1.48<br>(-18.76, 15.80)<br>P=0.867 | -4.30<br>(-13.66, 5.06)<br>P=0.368                   | -1.44<br>(-6.95, 4.07)<br>P=0.609                          | 11.31<br>(-34.47, 57.10)<br>P=0.628                          | -2.56<br>(-9.29, 4.16)<br>P=0.455                       | 1.66<br>(-18.01, 21.33)<br>P=0.868                      |
|                      | Indian  | -0.60<br>(-3.31, 2.10)<br>P=0.661                       | -0.64<br>(-16.03, 14.75)<br>P=0.935 | 3.23<br>(-6.22, 12.67)<br>P=0.503                    | <b>6.91</b><br><b>(1.54, 12.28)</b><br><b>P=0.012</b>      | 13.37<br>(-35.12, 61.86)<br>P=0.589                          | -0.01<br>(-6.60, 6.58)<br>P=0.997                       | 9.15<br>(-9.34, 27.65)<br>P=0.332                       |
| Running              | Chinese | -0.25<br>(-0.55, 0.05)<br>P=0.097                       | -1.12<br>(-2.38, 0.13)<br>P=0.080   | 0.13<br>(-1.22, 1.48)<br>P=0.848                     | <b>-1.37</b><br><b>(-2.19, -0.56)</b><br><b>P&lt;0.001</b> | <b>-6.39</b><br><b>(-11.76, -1.02)</b><br><b>P=0.020</b>     | 0.43<br>(-0.63, 1.49)<br>P=0.427                        | -0.83<br>(-3.35, 1.69)<br>P=0.518                       |
|                      | Malay   | <b>-0.63</b><br><b>(-1.19, -0.08)</b><br><b>P=0.026</b> | -1.56<br>(-5.04, 1.92)<br>P=0.379   | -1.34<br>(-3.19, 0.51)<br>P=0.155                    | <b>-1.18</b><br><b>(-2.27, -0.09)</b><br><b>P=0.034</b>    | <b>-15.59</b><br><b>(-24.28, -6.90)</b><br><b>P&lt;0.001</b> | <b>1.43</b><br><b>(0.15, 2.71)</b><br><b>P=0.028</b>    | <b>-4.03</b><br><b>(-7.77, -0.29)</b><br><b>P=0.035</b> |
|                      | Indian  | <b>-0.67</b><br><b>(-1.25, -0.08)</b><br><b>P=0.027</b> | -2.23<br>(-5.58, 1.12)<br>P=0.192   | -0.13<br>(-2.16, 1.90)<br>P=0.900                    | -0.39<br>(-1.54, 0.76)<br>P=0.509                          | -9.69<br>(-19.63, 0.26)<br>P=0.056                           | 0.93<br>(-0.42, 2.28)<br>P=0.178                        | -0.69<br>(-4.48, 3.11)<br>P=0.723                       |
| Strength and fitness | Chinese | -0.12<br>(-0.38, 0.13)<br>P=0.345                       | -1.00<br>(-2.09, 0.10)<br>P=0.074   | <b>1.38</b><br><b>(0.19, 2.58)</b><br><b>P=0.023</b> | -0.02<br>(-0.74, 0.70)<br>P=0.959                          | -0.31<br>(-5.02, 4.39)<br>P=0.897                            | <b>1.85</b><br><b>(0.92, 2.78)</b><br><b>P&lt;0.001</b> | 0.70<br>(-1.51, 2.91)<br>P=0.534                        |
|                      | Malay   | -0.18<br>(-0.66, 0.30)<br>P=0.461                       | -0.45<br>(-3.44, 2.55)<br>P=0.770   | 1.35<br>(-0.27, 2.96)<br>P=0.102                     | -0.25<br>(-1.21, 0.70)<br>P=0.601                          | -3.50<br>(-11.03, 4.02)<br>P=0.362                           | 0.81<br>(-0.29, 1.92)<br>P=0.149                        | 1.93<br>(-1.30, 5.17)<br>P=0.242                        |
|                      | Indian  | -0.48<br>(-0.98, 0.02)                                  | -1.96<br>(-4.79, 0.87)              | 1.35<br>(-0.39, 3.08)                                | 0<br>(-0.99, 0.98)                                         | <b>-11.53</b><br><b>(-19.99, -3.06)</b>                      | <b>2.12</b><br><b>(0.97, 3.27)</b>                      | -1.75<br>(-4.99, 1.49)                                  |

|            |         |                                                         |                                                       |                                   |                                                      |                                                      |                                   |                                   |
|------------|---------|---------------------------------------------------------|-------------------------------------------------------|-----------------------------------|------------------------------------------------------|------------------------------------------------------|-----------------------------------|-----------------------------------|
|            |         | P=0.058                                                 | P=0.176                                               | P=0.128                           | P=0.992                                              | <b>P=0.008</b>                                       | <b>P&lt;0.001</b>                 | P=0.289                           |
| Swimming   | Chinese | <b>0.62</b><br><b>(0.30, 0.94)</b><br><b>P&lt;0.001</b> | 1.02<br>(-0.35, 2.40)<br>P=0.143                      | 0.68<br>(-0.79, 2.15)<br>P=0.365  | <b>0.95</b><br><b>(0.06, 1.83)</b><br><b>P=0.037</b> | 4.51<br>(-1.34, 10.36)<br>P=0.131                    | -1.01<br>(-2.17, 0.14)<br>P=0.086 | 1.37<br>(-1.36, 4.11)<br>P=0.325  |
|            | Malay   | 0.53<br>(-0.3, 1.37)<br>P=0.213                         | <b>7.33</b><br><b>(2.09, 12.56)</b><br><b>P=0.006</b> | -1.89<br>(-4.65, 0.87)<br>P=0.180 | -0.21<br>(-1.84, 1.42)<br>P=0.800                    | 9.31<br>(-3.64, 22.27)<br>P=0.159                    | -0.44<br>(-2.34, 1.47)<br>P=0.654 | -1.06<br>(-6.64, 4.53)<br>P=0.711 |
|            | Indian  | 0.36<br>(-0.43, 1.16)<br>P=0.373                        | -0.52<br>(5.04, 4.00)<br>P=0.822                      | -0.03<br>(-2.74, 2.69)<br>P=0.985 | 0.11<br>(-1.43, 1.66)<br>P=0.885                     | 0.31<br>(-13.13, 13.74)<br>P=0.964                   | 1.25<br>(-0.57, 3.08)<br>P=0.179  | 3.30<br>(-1.82, 8.43)<br>P=0.207  |
| Walking    | Chinese | -0.06<br>(-0.28, 0.16)<br>P=0.601                       | 0.06<br>(-0.88, 0.99)<br>P=0.906                      | 0.01<br>(-1.01, 1.04)<br>P=0.980  | 0.34<br>(-0.28, 0.96)<br>P=0.285                     | <b>4.78</b><br><b>(0.73, 8.83)</b><br><b>P=0.021</b> | 0.17<br>(-0.63, 0.97)<br>P=0.680  | -0.98<br>(-2.88, 0.92)<br>P=0.311 |
|            | Malay   | 0.02<br>(-0.42, 0.45)<br>P=0.941                        | 0.13<br>(-2.61, 2.87)<br>P=0.926                      | 0.90<br>(-0.58, 2.38)<br>P=0.235  | 0.59<br>(-0.28, 1.46)<br>P=0.183                     | -1.80<br>(-8.69, 5.09)<br>P=0.608                    | 0.58<br>(-0.43, 1.60)<br>P=0.258  | 0.57<br>(-2.39, 3.53)<br>P=0.705  |
|            | Indian  | -0.07<br>(-0.51, 0.36)<br>P=0.744                       | -0.90<br>(-3.39, 1.59)<br>P=0.478                     | 0.08<br>(-1.45, 1.60)<br>P=0.923  | 0.43<br>(-0.44, 1.29)<br>P=0.336                     | -3.63<br>(-11.11, 3.84)<br>P=0.341                   | 0.81<br>(-0.21, 1.82)<br>P=0.120  | 0.56<br>(-2.30, 3.41)<br>P=0.702  |
| Other LTPA | Chinese | -0.09<br>(-0.71, 0.54)<br>P=0.783                       | -0.72<br>(-3.36, 1.92)<br>P=0.593                     | 0.38<br>(-2.47, 3.23)<br>P=0.793  | -0.83<br>(-2.55, 0.89)<br>P=0.345                    | -0.66<br>(-11.99, 10.67)<br>P=0.909                  | -0.02<br>(-2.26, 2.22)<br>P=0.987 | 0.11<br>(-5.19, 5.41)<br>P=0.967  |
|            | Malay   | 0.38<br>(-0.49, 1.26)<br>P=0.393                        | 2.79<br>(-2.71, 8.28)<br>P=0.320                      | -1.06<br>(-3.95, 1.83)<br>P=0.473 | -1.33<br>(-3.03, 0.38)<br>P=0.127                    | -6.10<br>(-19.66, 7.47)<br>P=0.378                   | 0.77<br>(-1.22, 2.76)<br>P=0.449  | 2.42<br>(-3.43, 8.26)<br>P=0.417  |
|            | Indian  | 0.64<br>(-0.57, 1.84)<br>P=0.302                        | 0.80<br>(-6.07, 7.67)<br>P=0.820                      | 1.50<br>(-2.63, 5.63)<br>P=0.477  | -0.15<br>(-2.50, 2.20)<br>P=0.899                    | -3.19<br>(-23.41, 17.04)<br>P=0.758                  | 1.03<br>(-1.72, 3.78)<br>P=0.461  | -1.14<br>(-8.85, 6.58)<br>P=0.773 |

\* Model adjusted for age, gender, ethnicity, educational status, smoking status, alcohol consumption and other exercise subtypes. CI, confidence interval; BMI, body mass index; HDL, high-density lipoprotein; LDL, low-density lipoprotein; LTPA, leisure time physical activity. Bold values indicate statistical significance.
